# Supplementary material for: Determination of ofloxacin in the presence of dopamine, paracetamol, and caffeine using a glassy carbon electrode based on carbon nanomaterials and gold nanoparticles
Source: Royal Society of Chemistry journal article supplement (doi:10.1039/d2ay01177h), 2022-01-01
Supplement: d2ay01177h1.pdf [file d2ay01177h1.pdf]

**SUPPLEMENTARY MATERIAL**

**Determination of ofloxacin in the presence of dopamine, paracetamol,  
and caffeine using a glassy carbon electrode based on carbon  
nanomaterial and gold nanoparticles**

Rebeca M. S. Silva<sup>a</sup>, Anderson M. Santos<sup>b</sup>, Ademar Wong<sup>b</sup>, Orlando Fatibello-Filho<sup>b</sup>,  
Fernando C. Moraes<sup>b</sup> and Marco A. S. Farias<sup>c\*</sup>

<sup>a</sup> *Department of Chemistry, Federal University of Amazonas, 69080-900, Manaus-AM, Brazil.*

<sup>b</sup> *Department of Chemistry, Federal University of São Carlos, 13560-970, São Carlos, SP, Brazil.*

<sup>c</sup> *Department of Agricultural and Rural Socioeconomics, Federal University of São Carlos, 13600-970, Araras, SP, Brazil*

\*Corresponding author

E-mail address: marcofarias@ufscar.br

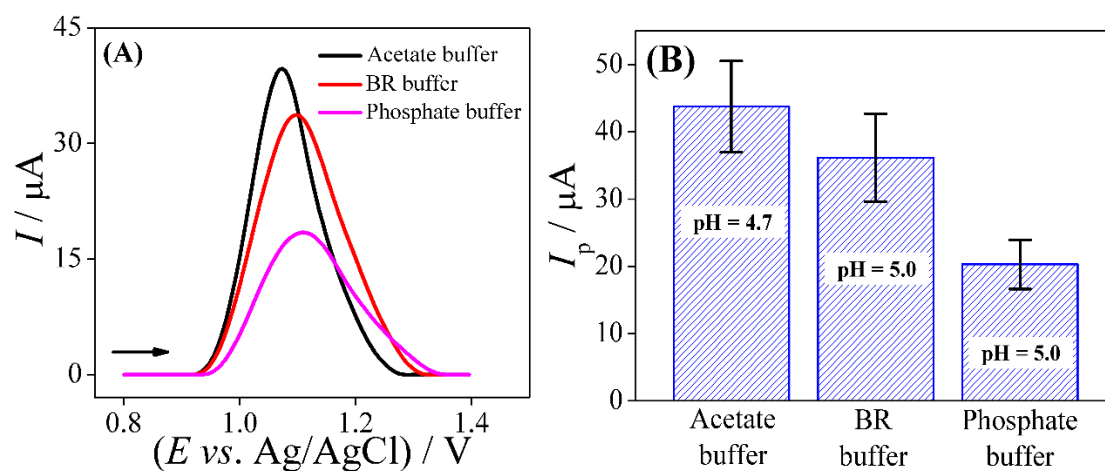

**Fig. S1.** (A) SW voltammograms obtained using the AuNPs-FG-CTS:EPH/GCE sensor in  $5.0 \mu\text{mol L}^{-1}$  OFL for different support electrolyte solutions: BR, acetate, and phosphate buffer. SWV parameters:  $f = 10 \text{ Hz}$ ,  $a = 75 \text{ mV}$  and  $\Delta E_s = 5 \text{ mV}$ . (B)  $I_p$  vs. analyte for the different support electrolyte solutions.

**Table S1.** Effect of concomitants on the SW voltammetric determination of a 4.0  $\mu\text{mol L}^{-1}$  OFL in 0.1 mol  $\text{L}^{-1}$  acetate buffer (pH 4.7) solution using a AuNPs-FG-CTS:EPH/GCE sensor.

| Possible Interferents*     | Average deviation (%)** |
|----------------------------|-------------------------|
| Microcrystalline Cellulose | 1.7                     |
| Magnesium Stearate         | 2.8                     |
| Povidone                   | -2.6                    |
| Starch                     | 1.1                     |
| Sodium Croscarmellose      | -1.3                    |
| Titanium Dioxide           | -3.2                    |
| Glucose                    | 1.6                     |
| Uric Acid                  | 2.2                     |
| Ascorbic Acid              | 3.1                     |
| Humic Acid                 | -2.8                    |

\* concentration ratio: 1 : 1 (m/m) (analyte: concomitants);

\*\*  $n = 3$ .
